# Supplementary material for: Loss-of-Function but Not Gain-of-Function Properties of Mutant TP53 Are Critical for the Proliferation, Survival, and Metastasis of a Broad Range of Cancer Cells
Source: PubMed Central journal article supplement — Cancer Discov. 2023 Oct 24;14(2):362–79. doi: 10.1158/2159-8290.CD-23-0402 (PMC10850947; doi:10.1158/2159-8290.cd-23-0402), 2023-10-24
Supplement: cd-23-0402_supplementary_data_figure_s1_suppsf1.pdf [file cd-23-0402_supplementary_data_figure_s1_suppsf1.pdf]

A

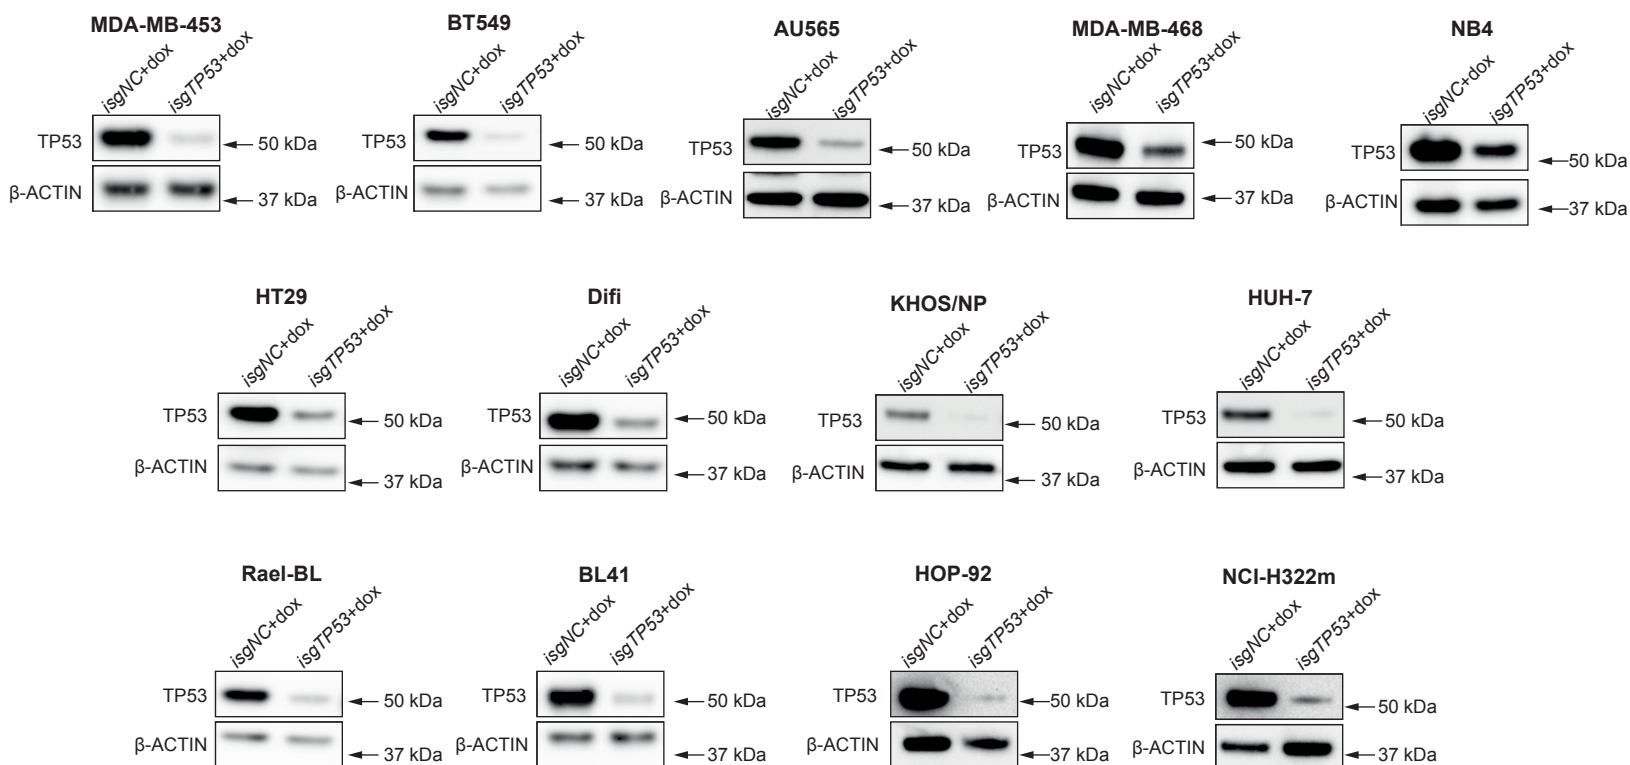

B

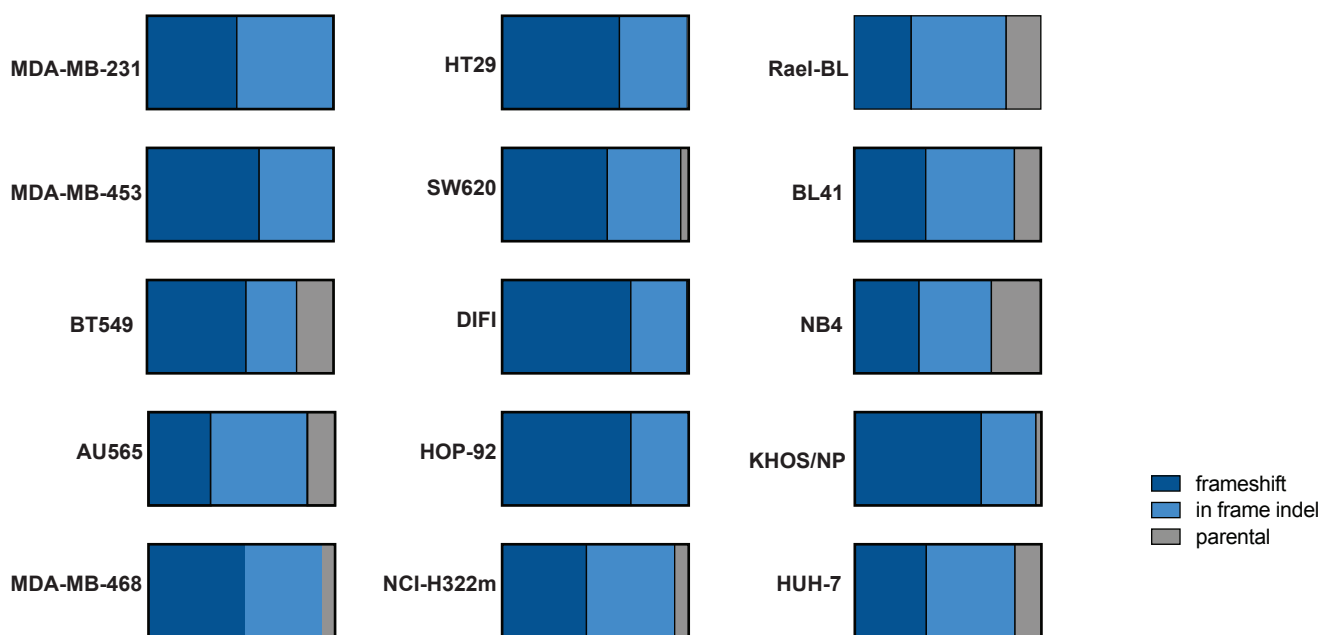

### Supplementary Figure S1. Targeted removal of mutant TP53 in diverse human cancer cell lines.

**A.** Western blot analysis confirming CRISPR/Cas9-mediated removal of mutant TP53 in the indicated human cancer cell lines, in which a mutant TP53 specific sgRNA (isgTP53) had been induced by treatment with doxycycline for 5 days. Doxycycline mediated induction of a non-targeting sgRNA, isgNC, was used as a negative control. As further negative controls, the cancer cell lines that had been transduced with either the isgTP53 or the isgNC were not treated with doxycycline. Probing for  $\beta$ -ACTIN was used as a protein loading control. Western blots shown are representative of 2 or 3 independent blots (independent experiments). **B.** NGS sequencing confirming the efficient deletion of the mutant TP53 genes from their endogenous loci in the indicated cancer cell lines 5 days after doxycycline mediated induction of the sgRNA targeting the mutant TP53 gene.
