# Supplementary material for: Loss-of-Function but Not Gain-of-Function Properties of Mutant TP53 Are Critical for the Proliferation, Survival, and Metastasis of a Broad Range of Cancer Cells
Source: PubMed Central journal article supplement — Cancer Discov. 2023 Oct 24;14(2):362–79. doi: 10.1158/2159-8290.CD-23-0402 (PMC10850947; doi:10.1158/2159-8290.cd-23-0402), 2023-10-24
Supplement: cd-23-0402_supplementary_data_figure_s9_suppsf9.pdf [file cd-23-0402_supplementary_data_figure_s9_suppsf9.pdf]

## Supplementary Figure 9

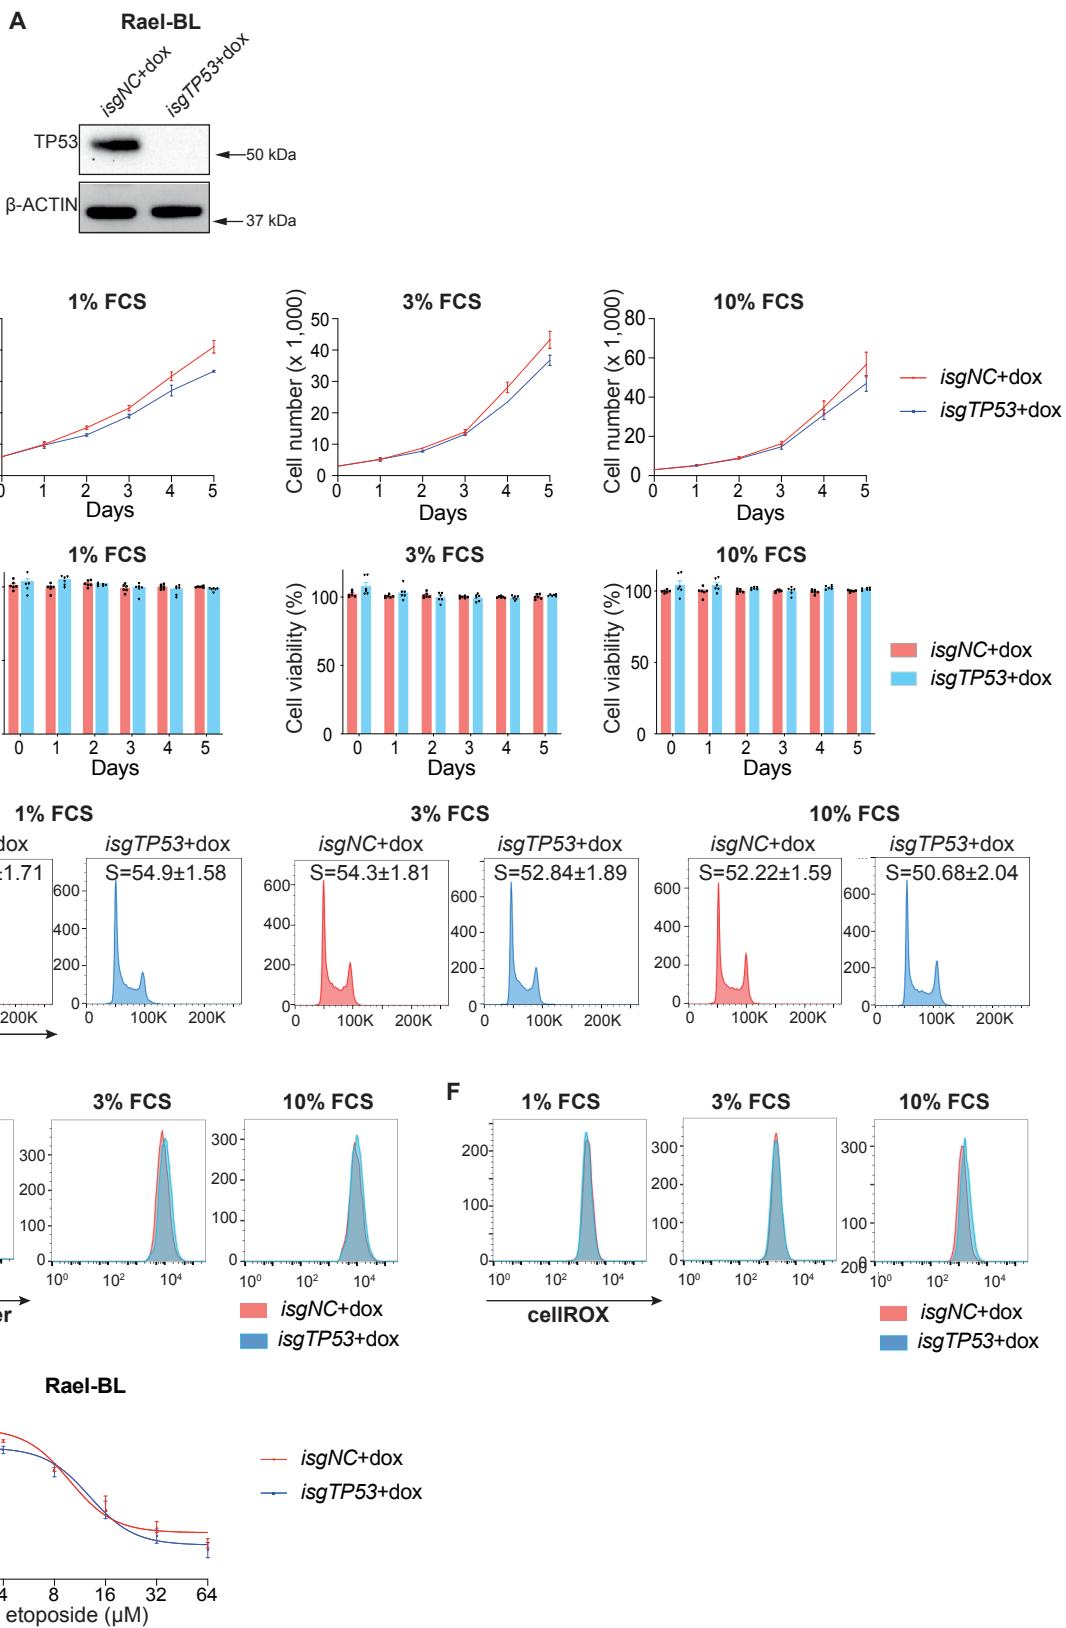

### Supplementary Figure S9. Single cell clones of the Rael-BL human Burkitt lymphoma cell line with complete removal of mutant TP53 expression do not display impaired survival or proliferation

**A.** Western blot analysis showing the complete absence of mutant TP53 in single cell clones of Rael-BL lymphoma cells that had been transduced with Cas9 and a TP53 specific sgRNA and treated with doxycycline (*isgTP53*). Cloned Rael-BL lymphoma cells that had been transduced with Cas9 and a non-targeting control sgRNA (*isgNC*) and treated with doxycycline were used as a control. Probing for  $\beta$ -ACTIN was used as a protein loading control. The Western blots shown are representative of 2 or 3 independent blots from independent experiments. **B.** In vitro growth the lymphoma cells described in (A) grown in medium with 1% FCS, 3% FCS or 10% FCS. **C.** In vitro survival of the cells described in (A, B) was determined by flow cytometric analysis. **D.** Cell cycle analysis of the lymphoma cells described in (A, B). **E.** Mitotracker staining of the cells described in (A, B). **F.** CellROX staining of the cells described in (A, B). **G.** Survival of control mutant TP53 expressing Rael-BL lymphoma cells and the mutant TP53 deleted derivatives after treatment in culture with the indicated concentrations of etoposide or vehicle. Data in (B), (C) and (G) are presented as mean $\pm$ SEM of experiments conducted in triplicate. Data presented in (D), (E) and (F) are representative of at least 3 independent experiments. There were no consistent significant differences between the mutant TP53 deleted Rael-BL lymphoma cells vs the control lymphoma cells in any of the experiments.
