# Supplementary material for: Loss-of-Function but Not Gain-of-Function Properties of Mutant TP53 Are Critical for the Proliferation, Survival, and Metastasis of a Broad Range of Cancer Cells
Source: PubMed Central journal article supplement — Cancer Discov. 2023 Oct 24;14(2):362–79. doi: 10.1158/2159-8290.CD-23-0402 (PMC10850947; doi:10.1158/2159-8290.cd-23-0402), 2023-10-24
Supplement: cd-23-0402_supplementary_data_figure_s11_suppsf11.pdf [file cd-23-0402_supplementary_data_figure_s11_suppsf11.pdf]

## Supplementary Figure 11

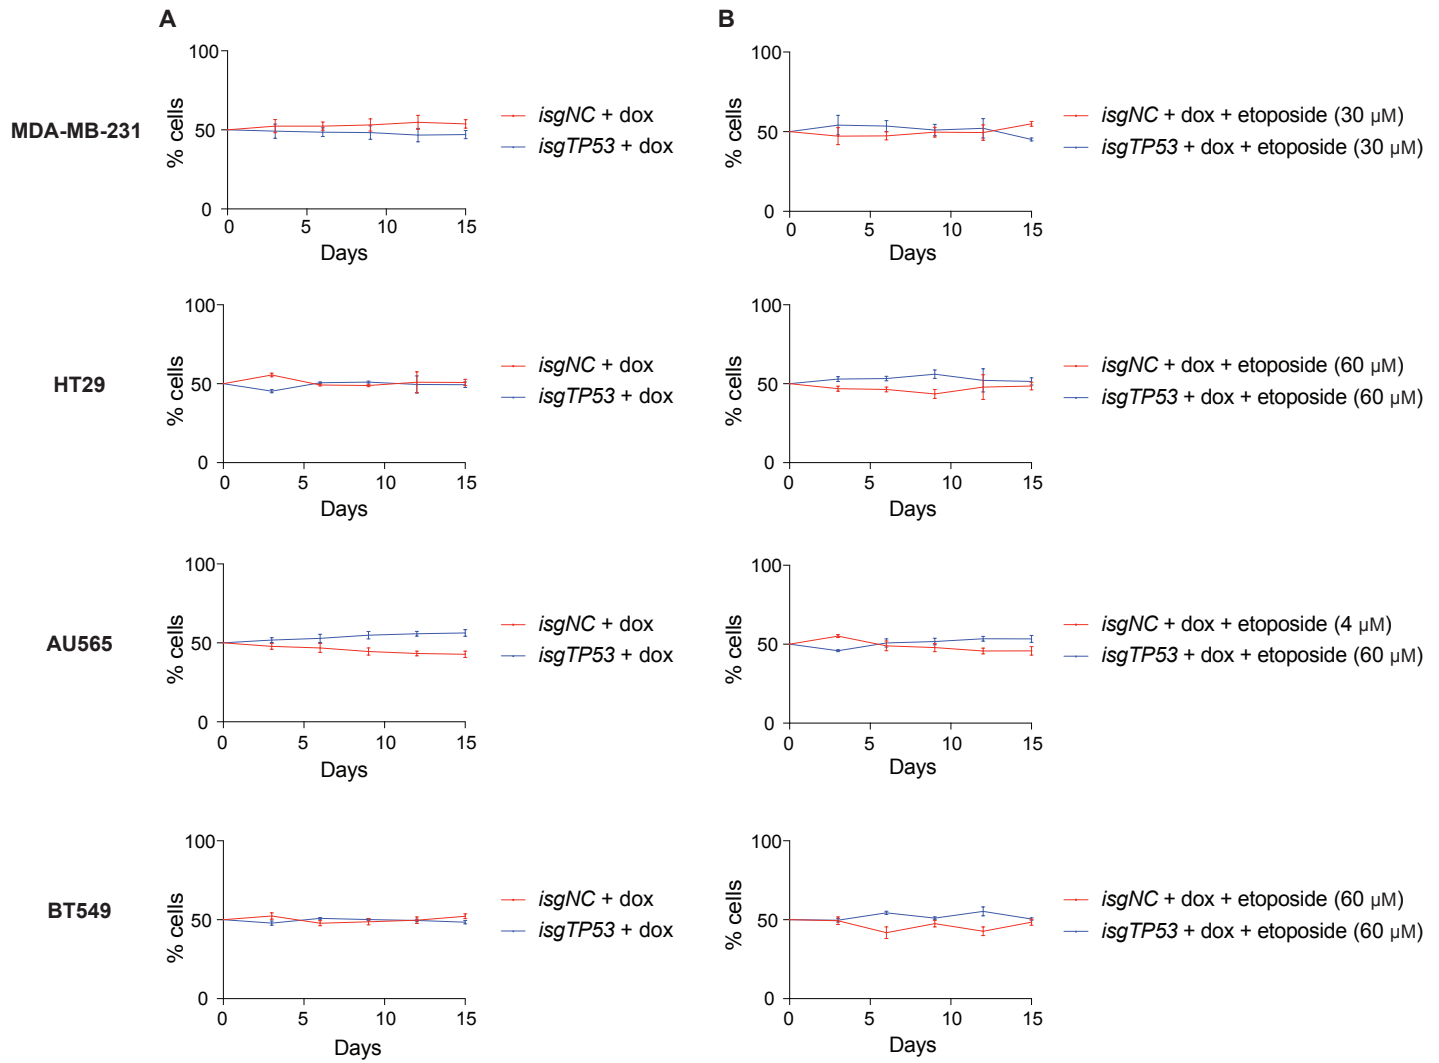

### Supplementary Figure S11. The removal of mutant TP53 does not cause a competitive growth disadvantage in human cancer cell lines in vitro

**A, B.** The indicated control mutant TP53 expressing human cancer cell lines, labeled with BFP, and their mutant TP53 deleted derivatives, labeled with GFP, were seeded each at 30K into 24-well plates at a 50/50 ratio and were left **(A)** untreated or **(B)** treated with the indicated doses of etoposide. The medium and etoposide were refreshed every 3 days when the percentages of viable GFP positive and viable BFP positive cancer cells were examined by flow cytometry. Data are expressed as mean  $\pm$  SEM of the percentages of viable cancer cells of a given type at a given time in culture, from three independent experiments.
