# Supplementary material for: Loss-of-Function but Not Gain-of-Function Properties of Mutant TP53 Are Critical for the Proliferation, Survival, and Metastasis of a Broad Range of Cancer Cells
Source: PubMed Central journal article supplement — Cancer Discov. 2023 Oct 24;14(2):362–79. doi: 10.1158/2159-8290.CD-23-0402 (PMC10850947; doi:10.1158/2159-8290.cd-23-0402), 2023-10-24
Supplement: cd-23-0402_supplementary_data_figure_s15_suppsf15.pdf [file cd-23-0402_supplementary_data_figure_s15_suppsf15.pdf]

## Supplementary Figure 15

MDA-MB-231

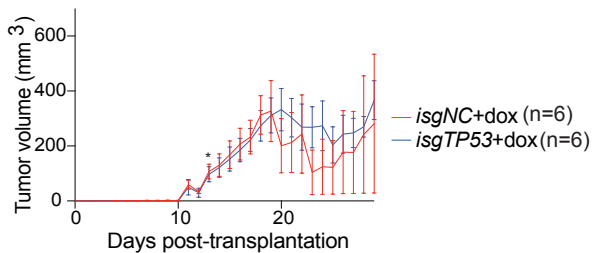

HT29

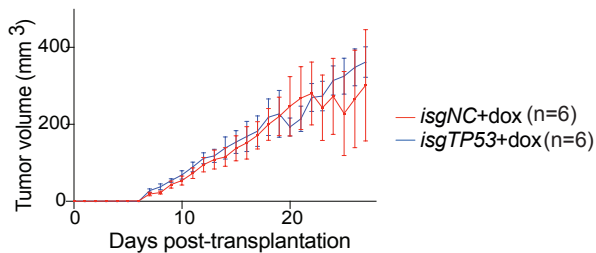

Rael-BL

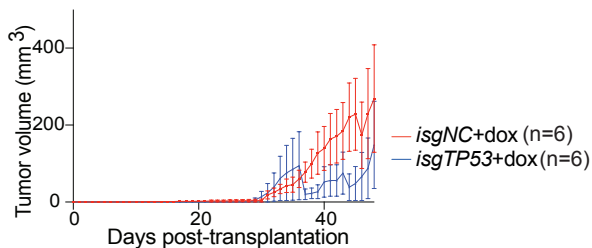

### Supplementary Figure S15. Removal of mutant TP53 does not impair the in vivo tumor growth upon transplantation of human cancer cell lines into NSG mice

Growth of the human cancer cell lines MDA-MB-231, SW620, Rael-BL, either control cells expressing mutant TP53 or the mutant TP53 deleted derivatives, in NSG mice (N=6 mice per cancer cell line) with tumor volume presented in mm<sup>3</sup>. Data are presented as mean±SEM of 6 independent mice for each type of cancer cell.
