# Supplementary material for: Loss-of-Function but Not Gain-of-Function Properties of Mutant TP53 Are Critical for the Proliferation, Survival, and Metastasis of a Broad Range of Cancer Cells
Source: PubMed Central journal article supplement — Cancer Discov. 2023 Oct 24;14(2):362–79. doi: 10.1158/2159-8290.CD-23-0402 (PMC10850947; doi:10.1158/2159-8290.cd-23-0402), 2023-10-24
Supplement: cd-23-0402_supplementary_data_figure_s17_suppsf17.pdf [file cd-23-0402_supplementary_data_figure_s17_suppsf17.pdf]

## Supplementary Figure 17

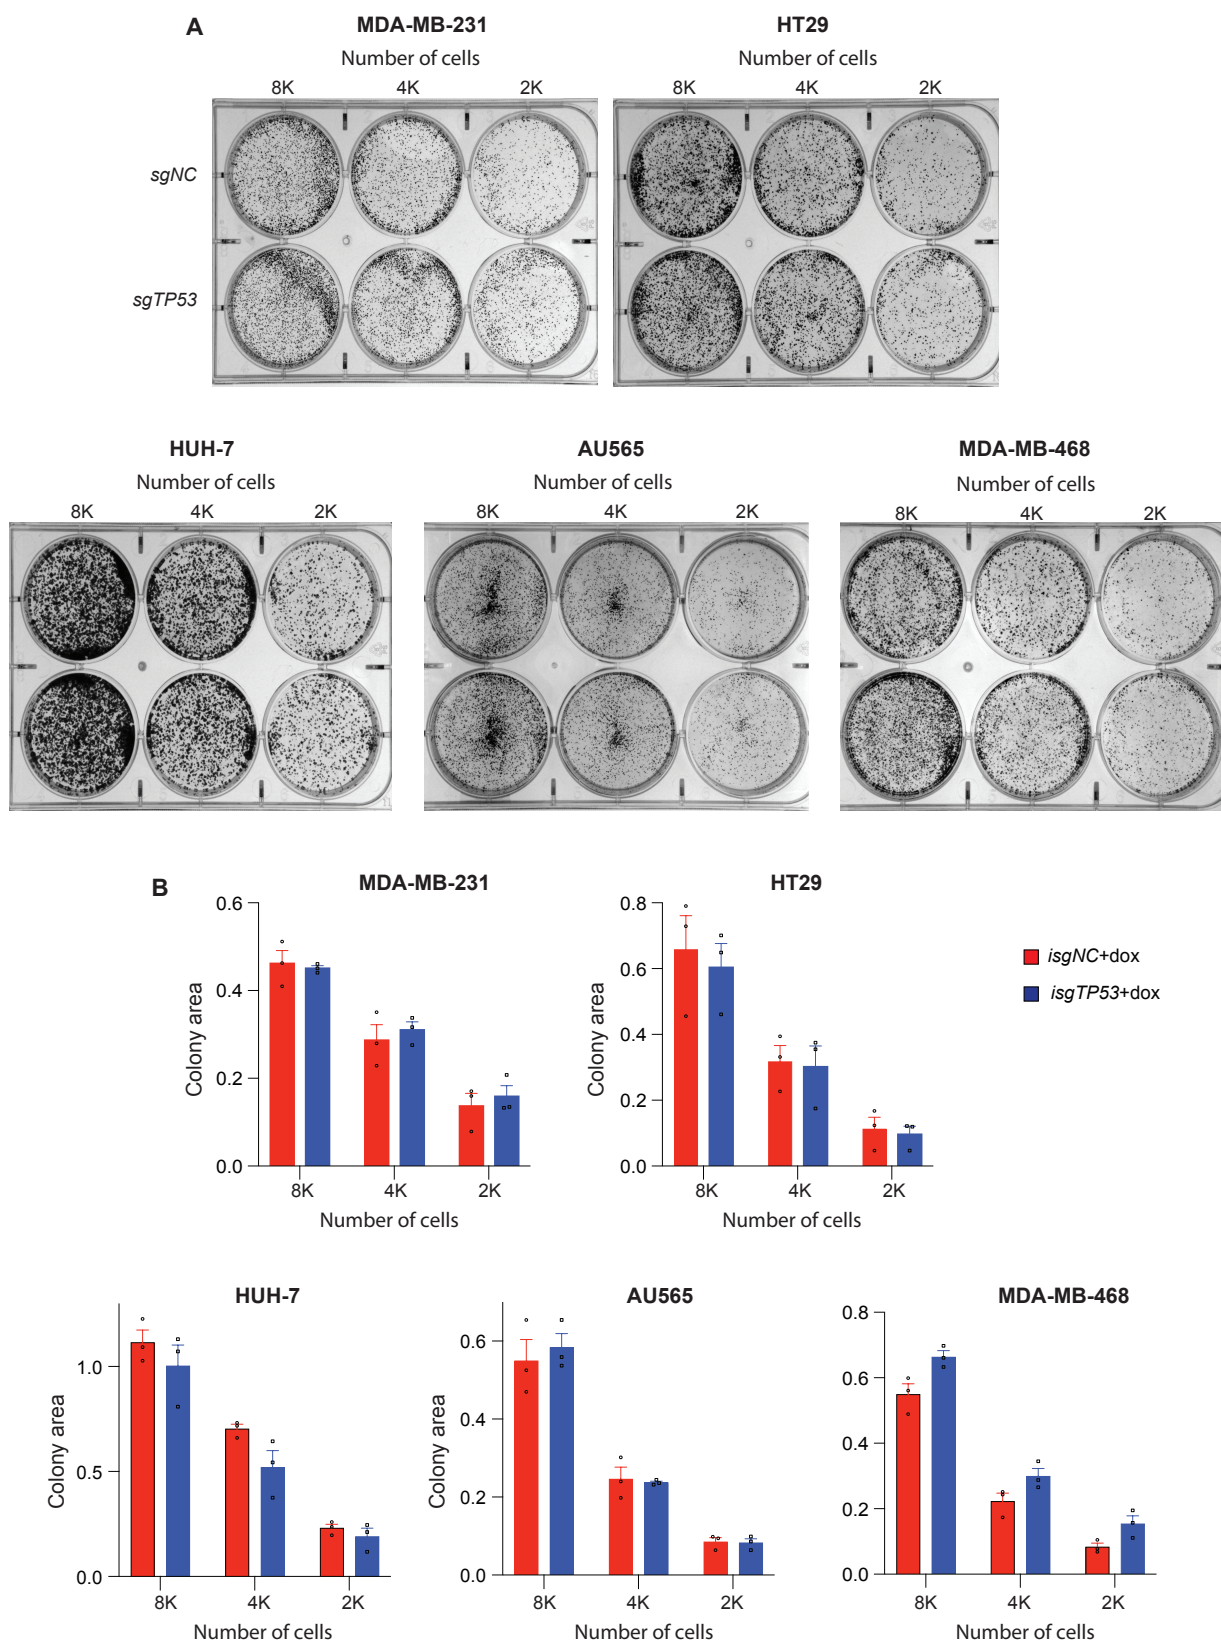

### Supplementary Figure S17. Removal of mutant TP53 does not impact the ability of human cancer cell lines to form colonies in vitro

**A.** Colony formation assays were performed with the human cancer cell lines MDA-MB-231, HT29, HUH-7, AU565 and MDA-MB-468, comparing control cancer cells expressing mutant TP53 (top row) with their mutant TP53 deleted derivatives (bottom row). Cancer cells were seeded at 8K, 4K or 2K cells per well. The photographs show examples of colony formation assays. Colonies were stained with 1% crystal violet. **B.** Measurements of colony areas from the experiments described in (A) as determined by software ImageJ. Three independent assays were performed for each genotype of each cancer cell line. Data are presented as mean $\pm$ SEM. Statistical analysis showing no significant differences in colony formation between the control cancer cells expressing mutant TP53 vs their mutant TP53 deleted derivatives.
