# Supplementary material for: Loss-of-Function but Not Gain-of-Function Properties of Mutant TP53 Are Critical for the Proliferation, Survival, and Metastasis of a Broad Range of Cancer Cells
Source: PubMed Central journal article supplement — Cancer Discov. 2023 Oct 24;14(2):362–79. doi: 10.1158/2159-8290.CD-23-0402 (PMC10850947; doi:10.1158/2159-8290.cd-23-0402), 2023-10-24
Supplement: cd-23-0402_supplementary_data_figure_s19_suppsf19.pdf [file cd-23-0402_supplementary_data_figure_s19_suppsf19.pdf]

# Supplementary Figure 19

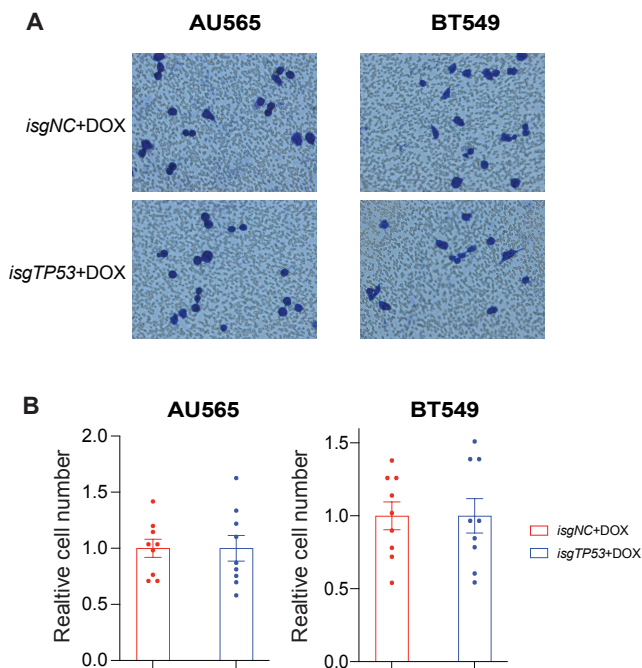

## Supplementary Figure S19. Removal of mutant TP53 does not impair the migration of human cancer cell lines in vitro

Trans-well assays were performed with the human cancer cell lines AU565 and BT549, comparing control cancer cells expressing mutant TP53 with their mutant TP53 deleted derivatives. **A**. Photographs of examples of trans-well assays. Cancer cells were stained with 1% crystal violet. **B**. Relative numbers of cancer cells are presented from three independent assays described in (A). Data in (B) are presented as mean $\pm$ SEM. No statistically significant differences were found between the control human cancer lines expressing mutant TP53 vs their mutant TP53 deleted derivatives.
