# Supplementary material for: Loss-of-Function but Not Gain-of-Function Properties of Mutant TP53 Are Critical for the Proliferation, Survival, and Metastasis of a Broad Range of Cancer Cells
Source: PubMed Central journal article supplement — Cancer Discov. 2023 Oct 24;14(2):362–79. doi: 10.1158/2159-8290.CD-23-0402 (PMC10850947; doi:10.1158/2159-8290.cd-23-0402), 2023-10-24
Supplement: cd-23-0402_supplementary_data_figure_s20_suppsf20.pdf [file cd-23-0402_supplementary_data_figure_s20_suppsf20.pdf]

## Supplementary Figure 20

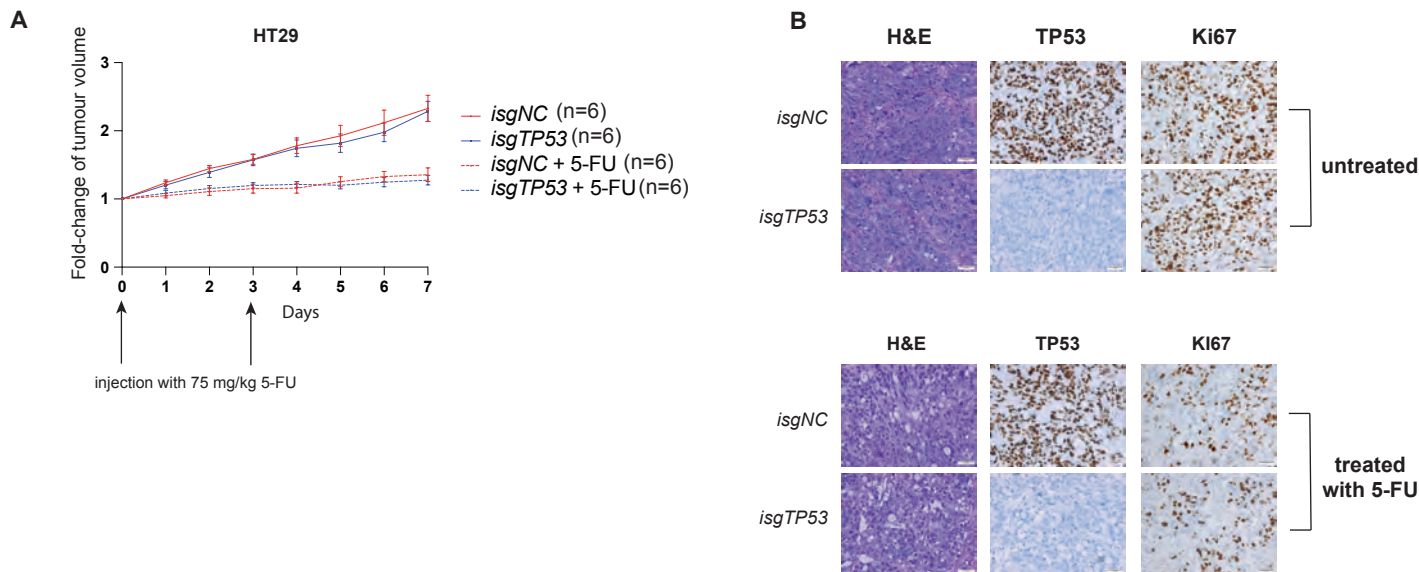

### Supplementary Figure S20. Removal of mutant TP53 does not impact the response of tumors derived from human cancer cell lines to the chemotherapeutic agent 5-FU in vivo

**A.** Growth rates of tumor xenografts of the human cancer line HT29, for tumors derived from control cancer cells expressing mutant TP53 or from their mutant TP53 deleted derivatives. Mice were treated on the days indicated with the indicated dose of 5-FU (N=6 mice per cell line). Data are presented as mean $\pm$ SEM of fold-change in tumor volume from 6 independent mice for each cell type. **B.** Histology images of the tumors from (A) showing H&E staining, or staining for mutant TP53 or Ki67, a marker of cell proliferation, in tumors taken from untreated mice or mice that had been treated with 5-FU. No significant differences in tumor growth or Ki67 staining were observed between the mutant TP53 deleted tumors compared to the control tumors expressing mutant TP53. The data shown in (B) are representative of 3 independent mice per type of cancer cell and treatment.
