# Supplementary material for: Loss-of-Function but Not Gain-of-Function Properties of Mutant TP53 Are Critical for the Proliferation, Survival, and Metastasis of a Broad Range of Cancer Cells
Source: PubMed Central journal article supplement — Cancer Discov. 2023 Oct 24;14(2):362–79. doi: 10.1158/2159-8290.CD-23-0402 (PMC10850947; doi:10.1158/2159-8290.cd-23-0402), 2023-10-24
Supplement: cd-23-0402_supplementary_data_figure_s21_suppsf21.pdf [file cd-23-0402_supplementary_data_figure_s21_suppsf21.pdf]

## Supplementary Figure 21

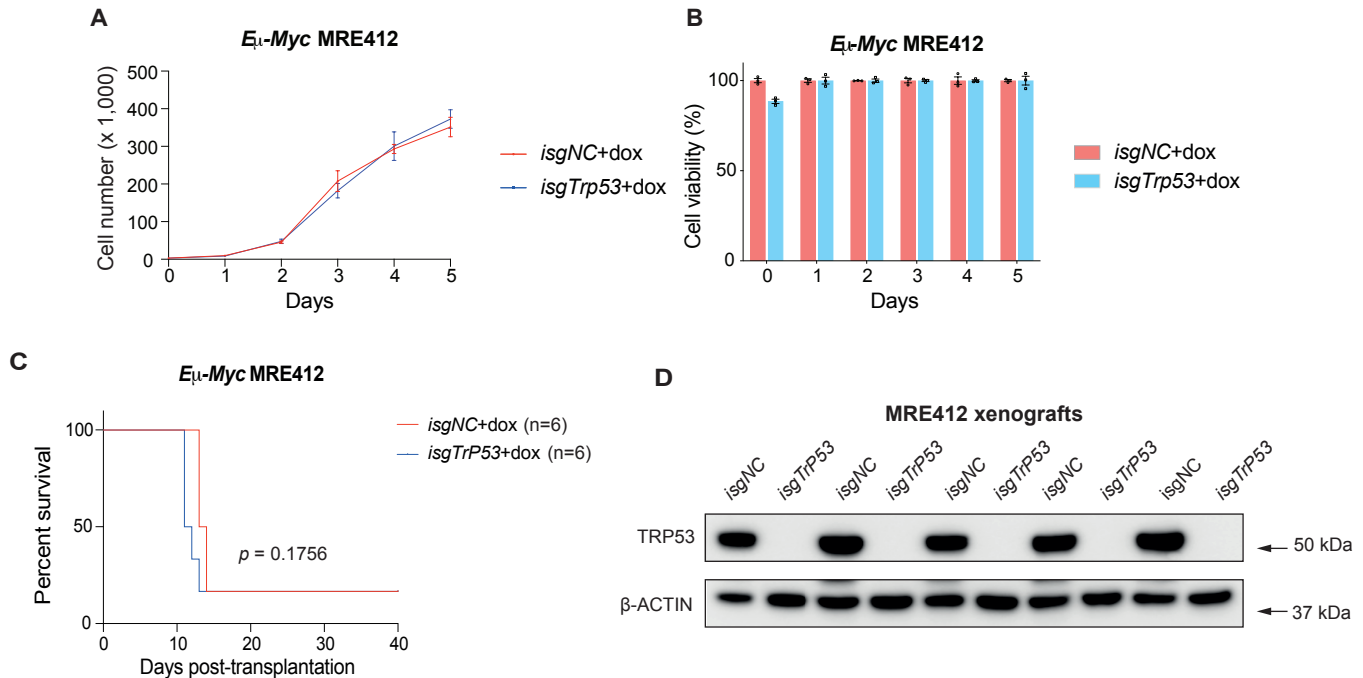

### Supplementary Figure S21. Removal of mutant TP53 does not impact the in vitro growth and survival of *E $\mu$ -Myc* mouse lymphoma cells or their growth in vivo in mice with a competent immune system

**A.** In vitro growth of *E $\mu$ -Myc* mouse lymphoma cells, either the mutant TP53 expressing control lymphoma cells or their mutant TP53 deleted derivatives. **B.** In vitro survival of the lymphoma cells described in (A). Data in (A) and (B) are presented as mean $\pm$ SEM of three independent experiments. **C.** Kaplan-Meier survival curves of immune-competent C57BL/6-Ly5.1 mice transplanted with control mutant TP53 expressing MRE412 *E $\mu$ -Myc* mouse lymphoma cells (Ly5.2) or their mutant TRP53 deleted derivatives. **D.** Western blot analysis of the lymphomas from (C) to verify the presence of mutant TRP53 in the control lymphoma cells or its absence in their mutant TP53 deleted derivatives. Probing for  $\beta$ -ACTIN was used as a protein loading control.
