# Supplementary material for: Loss-of-Function but Not Gain-of-Function Properties of Mutant TP53 Are Critical for the Proliferation, Survival, and Metastasis of a Broad Range of Cancer Cells
Source: PubMed Central journal article supplement — Cancer Discov. 2023 Oct 24;14(2):362–79. doi: 10.1158/2159-8290.CD-23-0402 (PMC10850947; doi:10.1158/2159-8290.cd-23-0402), 2023-10-24
Supplement: cd-23-0402_supplementary_data_figure_s22_suppsf22.pdf [file cd-23-0402_supplementary_data_figure_s22_suppsf22.pdf]

## Supplementary Figure 22

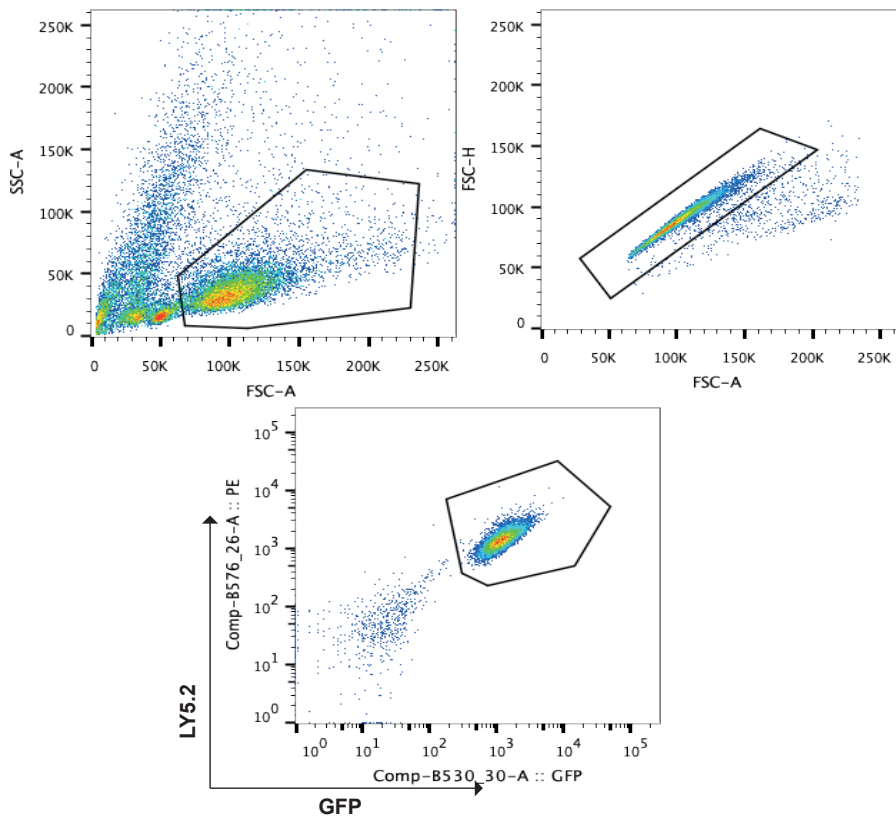

### Supplementary Figure S22. Flow cytometric analysis of GFP and Ly5.2 expression to establish that the lymphoma cells in recipient mice were derived from the transplanted *E $\mu$ -Myc* mouse lymphoma cells

*E $\mu$ -Myc* mouse lymphoma cells (C57BL/6J-Ly5.2 background) were identified in the spleens of sick recipient (lymphoma cell transplanted) immune-competent mice (C57BL/6J-Ly5.1 background) as GFP and Ly5.2 double positive.
