# Supplementary material for: Loss-of-Function but Not Gain-of-Function Properties of Mutant TP53 Are Critical for the Proliferation, Survival, and Metastasis of a Broad Range of Cancer Cells
Source: PubMed Central journal article supplement — Cancer Discov. 2023 Oct 24;14(2):362–79. doi: 10.1158/2159-8290.CD-23-0402 (PMC10850947; doi:10.1158/2159-8290.cd-23-0402), 2023-10-24
Supplement: cd-23-0402_supplementary_data_figure_s23_suppsf23.pdf [file cd-23-0402_supplementary_data_figure_s23_suppsf23.pdf]

## Supplementary Figure 23

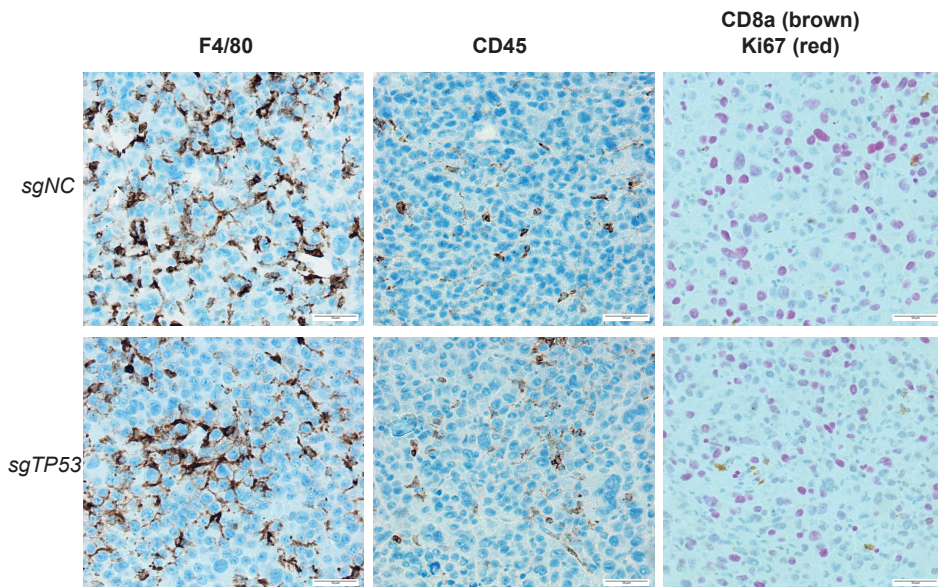

### **Supplementary Figure S23. Removal of mutant TP53 does not impact the tumor microenvironment upon transplantation of mouse breast cancer cell line E0771 into mice with a competent immune system**

EO771 mouse breast cancer cells, either mutant TRP53 expressing control cancer cells or their mutant TRP53 deficient derivatives, were transplanted into Cas9 transgenic immune-competent mice to prevent immune rejection of cancer cells caused by their expression of Cas9 (N=7 recipient mice for each type of cancer cell). Histology images showing the staining for F4/80 (macrophage marker), CD45 (total leukocyte marker), CD8a (cytotoxic T cell marker) and Ki67 (marker of cell proliferation) in tumors (*sgNC* or *sgTP53*). Magnification 200X.
