# Supplementary material for: Loss-of-Function but Not Gain-of-Function Properties of Mutant TP53 Are Critical for the Proliferation, Survival, and Metastasis of a Broad Range of Cancer Cells
Source: PubMed Central journal article supplement — Cancer Discov. 2023 Oct 24;14(2):362–79. doi: 10.1158/2159-8290.CD-23-0402 (PMC10850947; doi:10.1158/2159-8290.cd-23-0402), 2023-10-24
Supplement: cd-23-0402_supplementary_data_figure_s24_suppsf24.pdf [file cd-23-0402_supplementary_data_figure_s24_suppsf24.pdf]

# Supplementary Figure 24

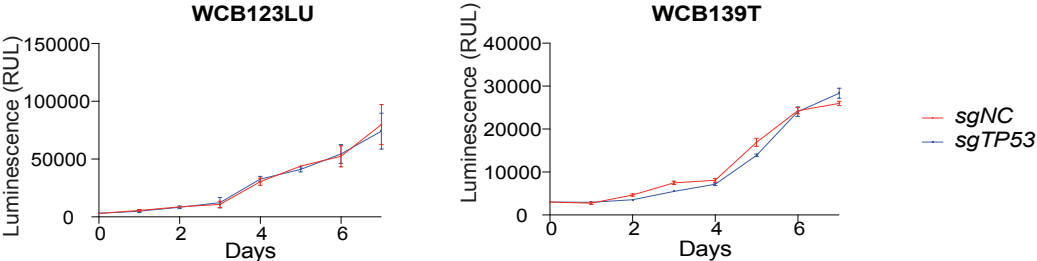

## Supplementary Figure S24. Removal of mutant TP53 does not impact the in vitro growth of human colon cancer derived organoids

In vitro growth of the indicated human colon cancer derived organoids, either the mutant TP53 expressing control cancer cells or their mutant TP53 deleted derivatives. Data are presented as mean±SEM of three independent experiments.
