# Supplementary material for: Loss-of-Function but Not Gain-of-Function Properties of Mutant TP53 Are Critical for the Proliferation, Survival, and Metastasis of a Broad Range of Cancer Cells
Source: PubMed Central journal article supplement — Cancer Discov. 2023 Oct 24;14(2):362–79. doi: 10.1158/2159-8290.CD-23-0402 (PMC10850947; doi:10.1158/2159-8290.cd-23-0402), 2023-10-24
Supplement: cd-23-0402_supplementary_data_figure_s25_suppsf25.pdf [file cd-23-0402_supplementary_data_figure_s25_suppsf25.pdf]

## Supplementary Figure 25

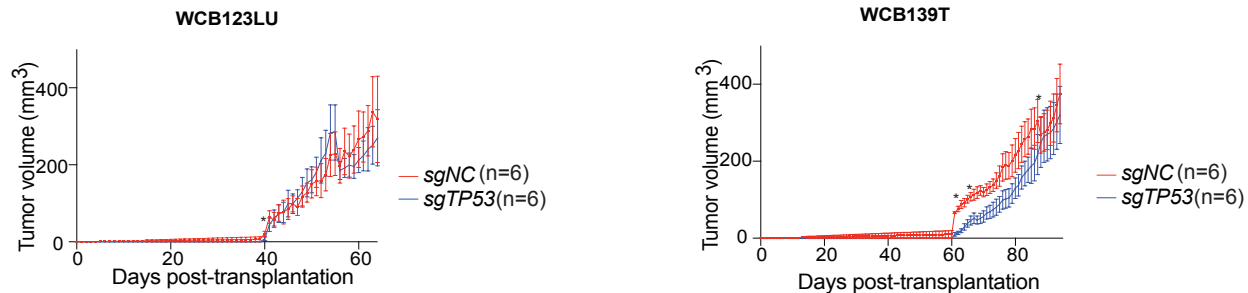

### **Supplementary Figure S25. Removal of mutant TP53 does not impair the in vivo tumor growth upon transplantation of human colon cancer derived organoids into NSG mice**

Growth of the human colon cancer derived organoids WCB123LU and WCB139T, either control cancer cells expressing mutant TP53 or their mutant TP53 deleted derivatives, in NSG mice (N=6 mice per cell line) with tumor volume presented in mm<sup>3</sup>. Data are presented as mean $\pm$ SEM of 6 independent mice for each type of cancer cell.
