# Supplementary material for: Loss-of-Function but Not Gain-of-Function Properties of Mutant TP53 Are Critical for the Proliferation, Survival, and Metastasis of a Broad Range of Cancer Cells
Source: PubMed Central journal article supplement — Cancer Discov. 2023 Oct 24;14(2):362–79. doi: 10.1158/2159-8290.CD-23-0402 (PMC10850947; doi:10.1158/2159-8290.cd-23-0402), 2023-10-24
Supplement: cd-23-0402_supplementary_data_figure_s27_suppsf27.pdf [file cd-23-0402_supplementary_data_figure_s27_suppsf27.pdf]

## Supplementary Figure 27

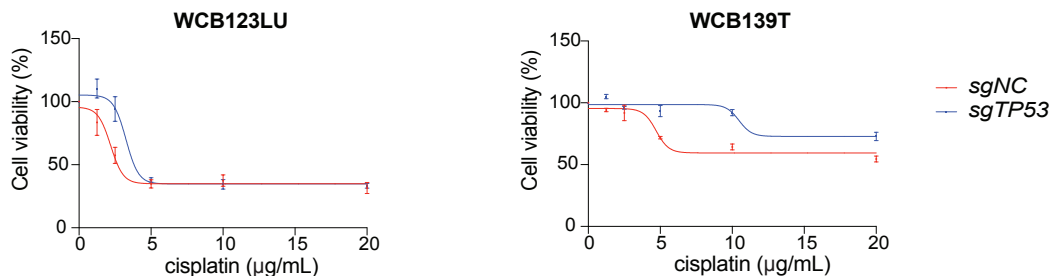

### Supplementary Figure S27. Removal of mutant TP53 does not impact the responses of human colon cancer derived organoids to the anti-cancer drug cisplatin

The viability of the human colon cancer organoids, either the mutant TP53 expressing control cancer cells or their mutant TP53 deleted derivatives, after treatment with the indicated concentrations of cisplatin for 96 h in vitro. Data are presented as mean±SEM of three independent experiments.
