# Supplementary figures and images for: Loss-of-Function but Not Gain-of-Function Properties of Mutant TP53 Are Critical for the Proliferation, Survival, and Metastasis of a Broad Range of Cancer Cells
Source: PubMed Central journal article supplement — Cancer Discov. 2023 Oct 24;14(2):362–79. doi: 10.1158/2159-8290.CD-23-0402 (PMC10850947; doi:10.1158/2159-8290.cd-23-0402), 2023-10-24

## Supplementary Figure 12

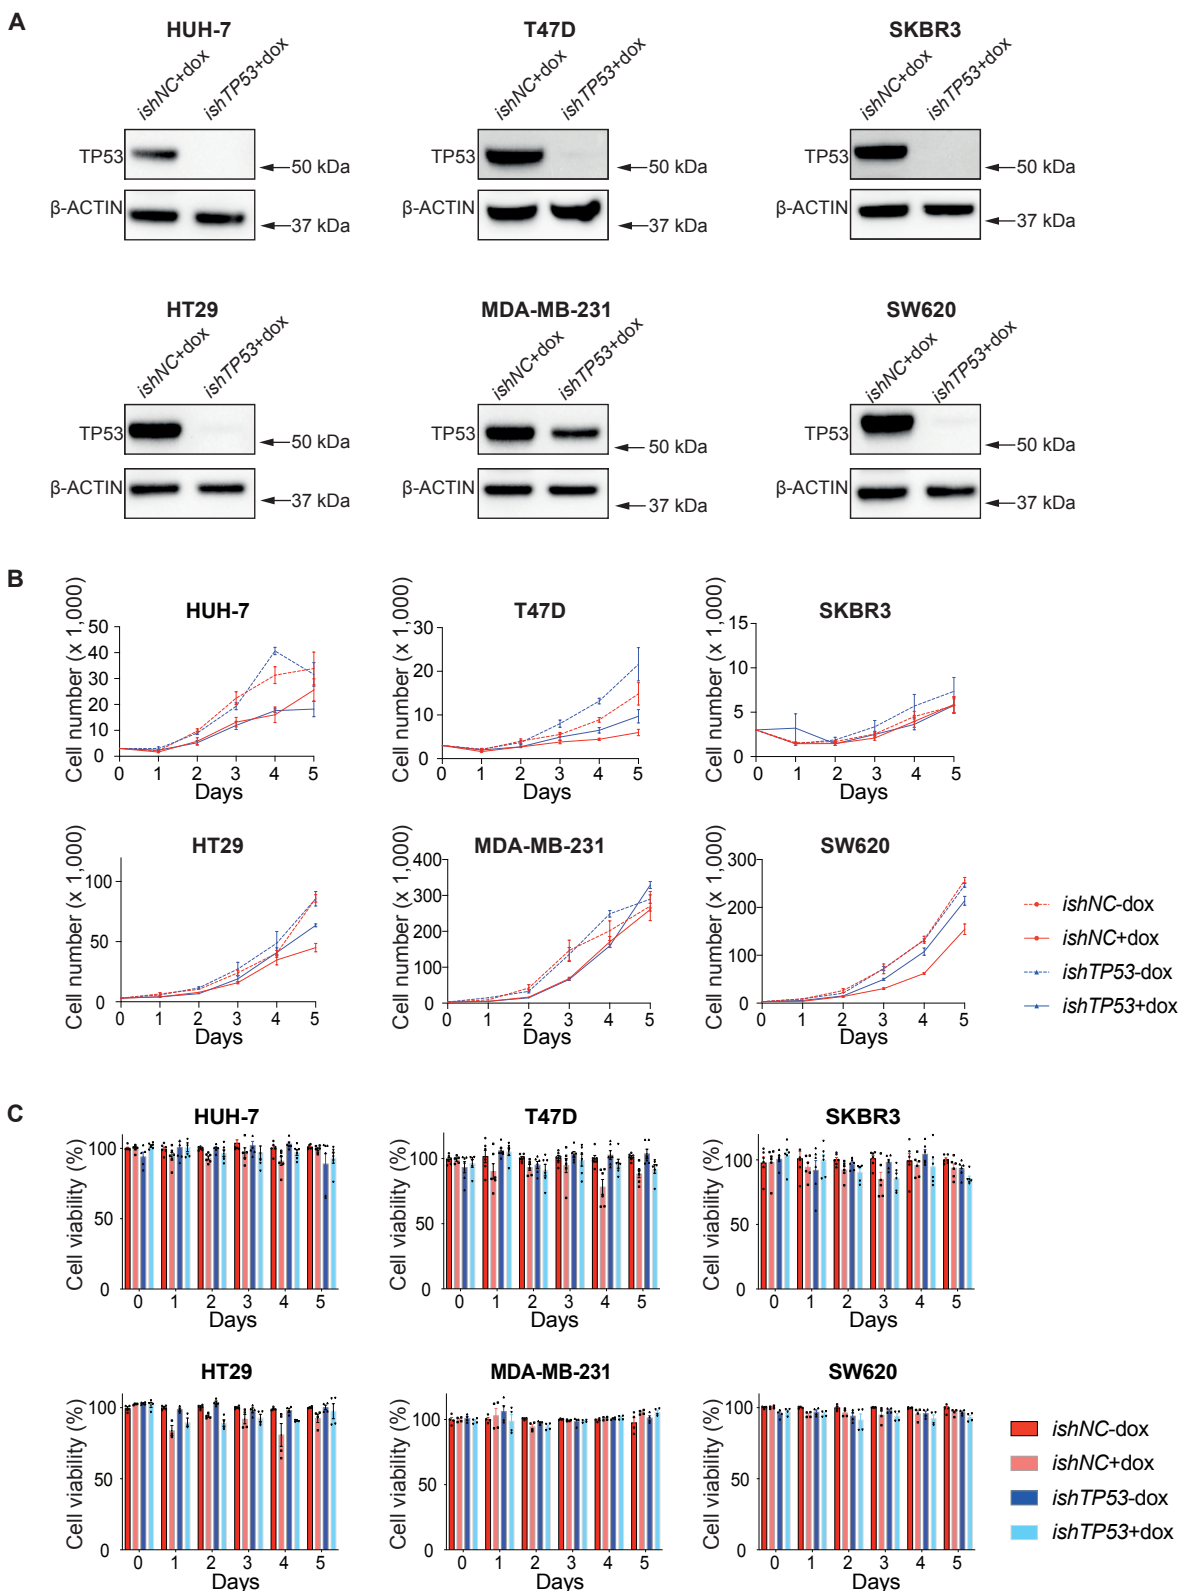

Supplement: cd-23-0402_supplementary_data_figure_s12_suppsf12.pdf [file cd-23-0402_supplementary_data_figure_s12_suppsf12.pdf]

## Supplementary Figure 14

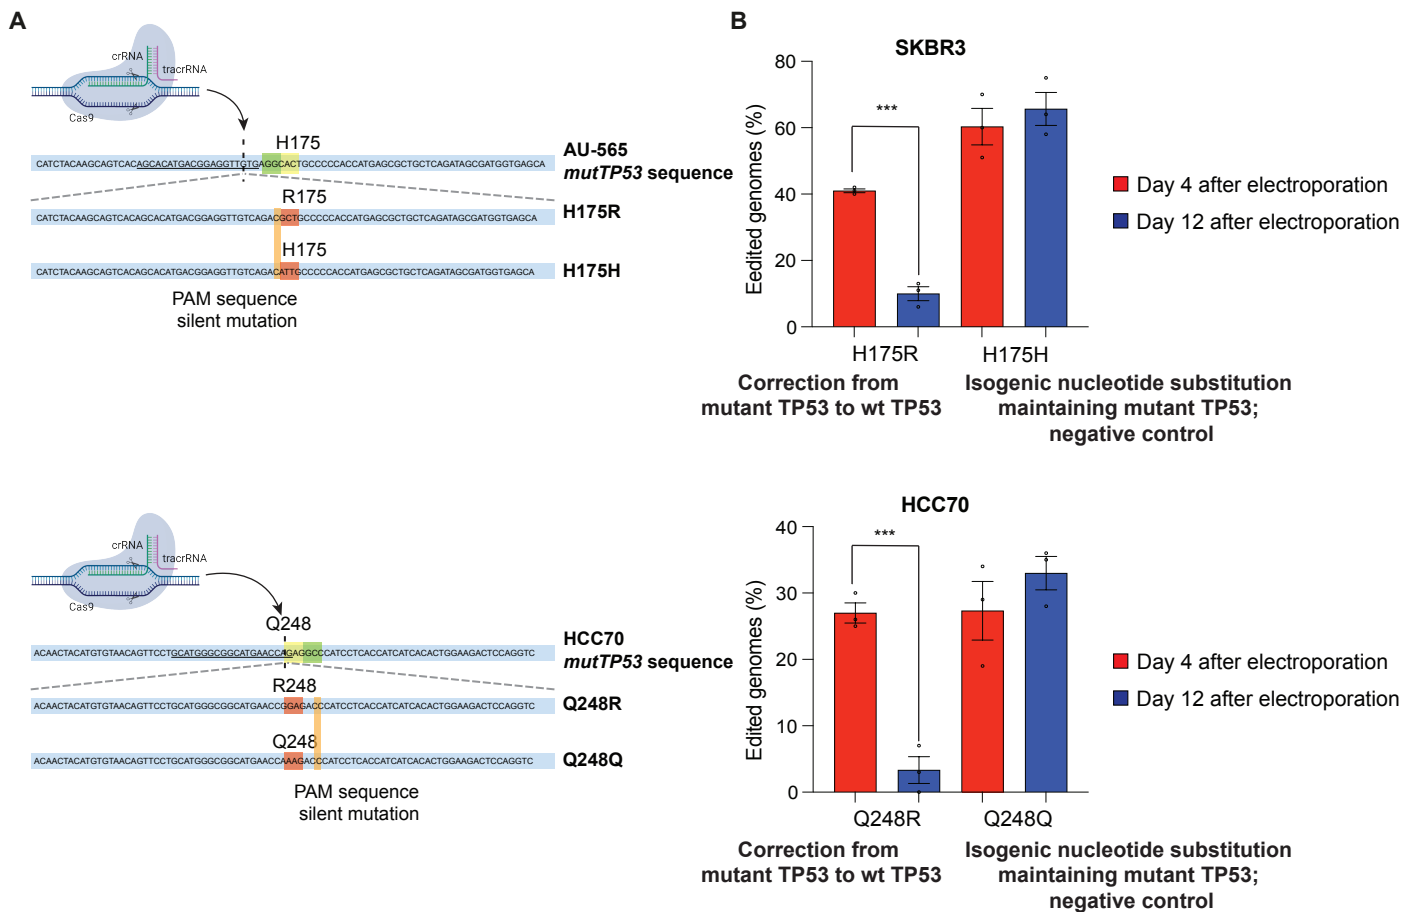

Supplement: cd-23-0402_supplementary_data_figure_s14_suppsf14.pdf [file cd-23-0402_supplementary_data_figure_s14_suppsf14.pdf]

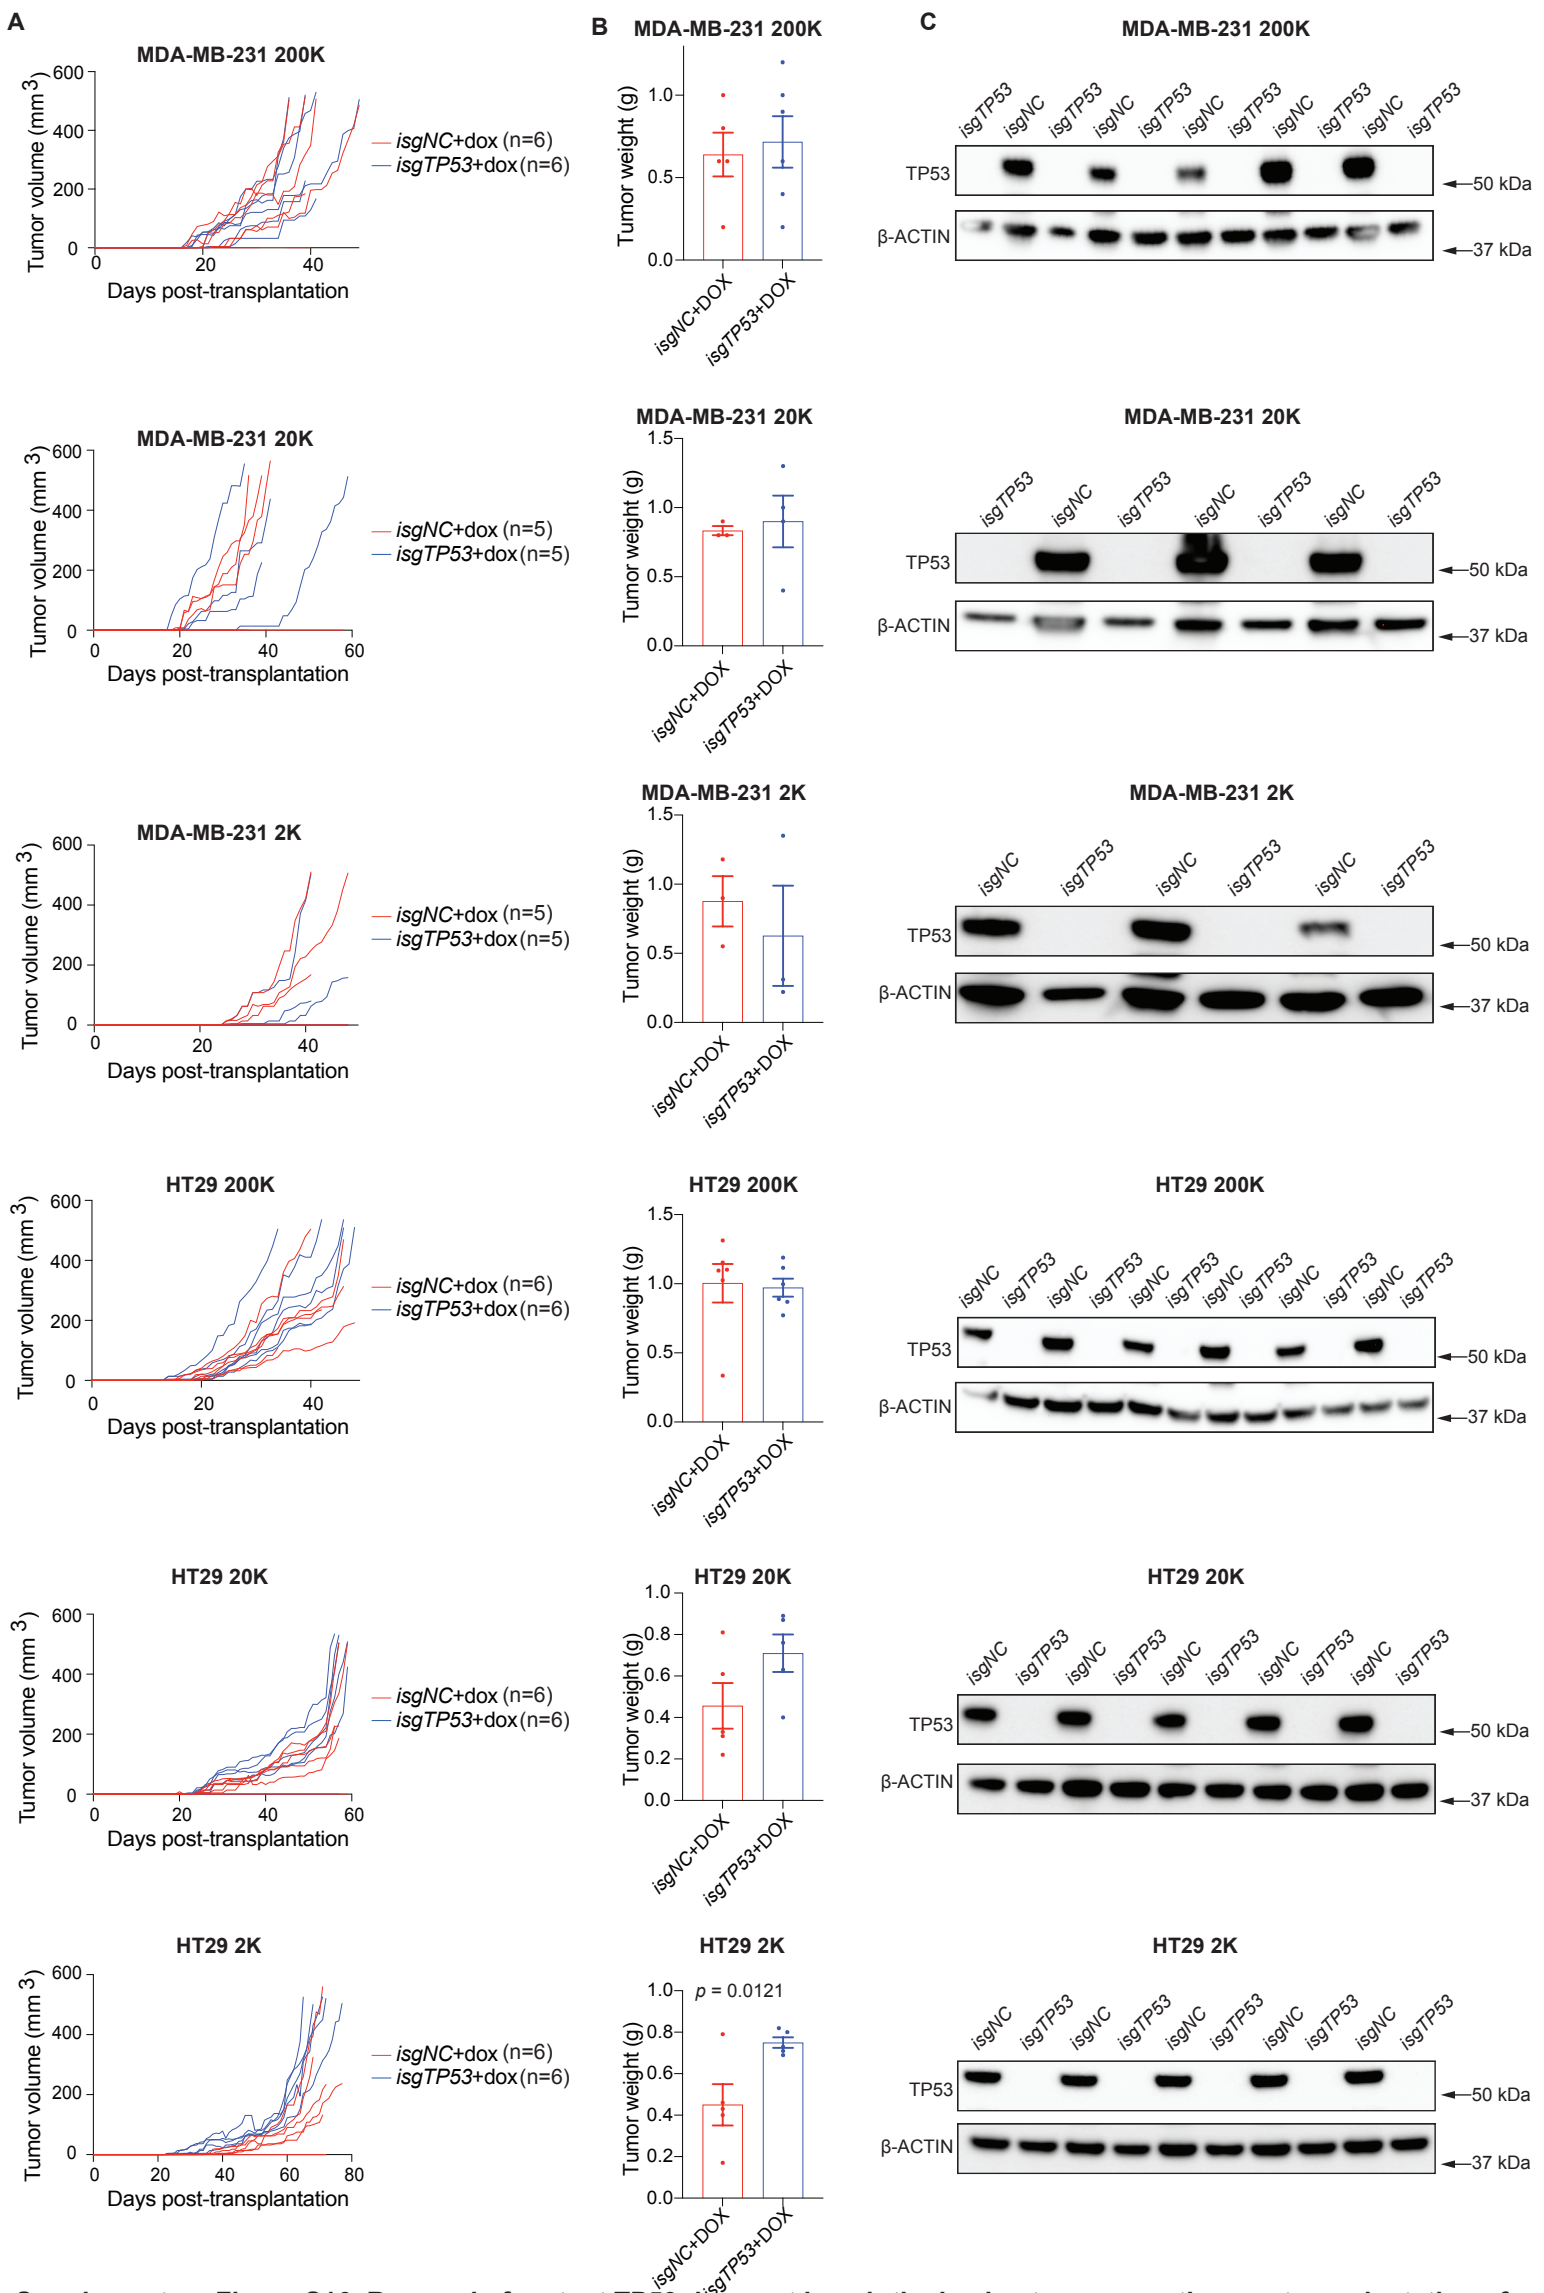

Supplement: cd-23-0402_supplementary_data_figure_s16_suppsf16.pdf [file cd-23-0402_supplementary_data_figure_s16_suppsf16.pdf]
